CORRECTION

# Correction: Comparative Y-chromosome analysis among Cypriots in the context of historical events and migrations

Irene Moutsouri, Anna Keravnou, Panayiotis Manoli, Stefania Bertoncini, Kyriaki Michailidou, Vasilis Christofi, Stavroulla Xenophontos, Marios A. Cariolou, Evy Bashiardes

This article [1] includes a reference error: the wrong article was listed for reference 16. The statements citing reference 16 should have cited the following:

Gurkan C, Sevay H, Demirdov DK, Hossoz S, Ceker D, Terali K, Erol AS. Turkish Cypriot paternal lineages bear an autochthonous character and closest resemblance to those from neighboring Near Eastern populations. *Ann Hum Biol.* 2017; 44(2):164–174. (<https://doi.org/10.1080/03014460.2016.1207805>) PMID: 27356680

In addition, the article does not include accurate terminology when describing the Syriac samples obtained from refugee camps in Erbil, Iraq. These samples were described in [1] as Syrian, Syria [Syrians] or Syria [Syriacs], whereas, article [2] indicates that these were Syriac samples “mostly collected at various refugee camps in Erbil”. Where samples from the Erbil camps are described in [1], “Syrian”, “Syria [Syrians]” or “Syria [Syriacs]” should be replaced by “Northern Iraq [Syriacs]”.

This pertains to the following in-text citations, summarized below in Table 1:

Results derived from analyses of the Erbil camp samples cannot be generalized as representing findings about the Syrian population.

The authors apologize to the authors of [2], the Editors and readers of *PLOS ONE* for these errors in the published article [1].

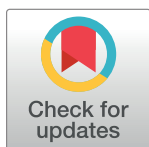

## OPEN ACCESS

**Citation:** Moutsouri I, Keravnou A, Manoli P, Bertoncini S, Michailidou K, Christofi V, et al. (2022) Correction: Comparative Y-chromosome analysis among Cypriots in the context of historical events and migrations. *PLoS ONE* 17(4): e0267875. <https://doi.org/10.1371/journal.pone.0267875>

**Published:** April 26, 2022

**Copyright:** © 2022 Moutsouri et al. This is an open access article distributed under the terms of the [Creative Commons Attribution License](https://creativecommons.org/licenses/by/4.0/), which permits unrestricted use, distribution, and reproduction in any medium, provided the original author and source are credited.

**Table 1. In-text corrections.**

| Article Section                             | Subheading, Paragraph, sentence                                      | Text in [1]                                                                                                    | Replacement Text        |
|---------------------------------------------|----------------------------------------------------------------------|----------------------------------------------------------------------------------------------------------------|-------------------------|
| Materials and Methods                       | Haplotype (Y-STR) based analysis, 3, 2                               | Syrians                                                                                                        | Northern Iraq [Syriacs] |
| Results                                     | Inter-population analysis, 1, 2                                      | Syria                                                                                                          |                         |
|                                             | Inter-population analysis, 1, 5                                      | Syrians                                                                                                        |                         |
|                                             | Inter-population analysis, 2, 2                                      | Syrians                                                                                                        |                         |
|                                             | Y-haplotypes shared among Cypriots and populations of interest, 1, 5 | Syrians                                                                                                        |                         |
|                                             | Discussion                                                           | Shared paternal ancestry among Greek Cypriots, Turkish Cypriots, Armenian Cypriots and Maronite Cypriots, 2, 9 |                         |
| Genetic distances between populations, 1, 1 |                                                                      | Syria                                                                                                          |                         |
| Genetic distances between populations, 2, 6 |                                                                      | Syrians                                                                                                        |                         |
| Genetic distances between populations, 2, 6 |                                                                      | Syria                                                                                                          |                         |
| Genetic distances between populations, 2, 7 |                                                                      | Syria                                                                                                          |                         |
| Figures                                     |                                                                      | Figure 1                                                                                                       |                         |
| Tables                                      | Table 3, column 1, row 8                                             | Syria [Syriacs]                                                                                                |                         |
|                                             | Table 3, column 1, row 22                                            |                                                                                                                |                         |
|                                             | Table 3, column 3, row 2                                             |                                                                                                                |                         |
|                                             | Table 3, column 1, row 14                                            |                                                                                                                |                         |
|                                             | Table 4, column 1, row 8                                             | Syria [Syrians]                                                                                                |                         |
| Supporting Information                      | S4 Table                                                             | Syria [Syriacs]                                                                                                |                         |

<https://doi.org/10.1371/journal.pone.0267875.t001>

## References

1. Moutsouri I, Keravnou A, Manoli P, Bertoncini S, Michailidou K, Christofi V, et al. (2021) Comparative Y-chromosome analysis among Cypriots in the context of historical events and migrations. PLoS ONE 16 (8): e0255140. <https://doi.org/10.1371/journal.pone.0255140> PMID: 34424929
2. Dogan S, Gurkan C, Dogan M, Balkaya HE, Tunc R, Demirdov DK, et al. (2017) A glimpse at the intricate mosaic of ethnicities from Mesopotamia: Paternal lineages of the Northern Iraqi Arabs, Kurds, Syriacs, Turkmens and Yazidis. PLoS ONE 12(11): e0187408. <https://doi.org/10.1371/journal.pone.0187408> PMID: 29099847
